# Supplementary material for: Heteropoly acid catalysts for the synthesis of fragrance compounds from biorenewables: isomerization of limonene oxide
Source: Royal Society of Chemistry journal article supplement (doi:10.1039/c2cy20526b), 2012-09-04
Supplement: c2cy20526b.pdf [file c2cy20526b.pdf]

# Heteropoly acid catalysts for the synthesis of fragrance compounds from biorenewables: isomerization of limonene oxide

Vinícius V. Costa,<sup>a</sup> Kelly A. da Silva Rocha,<sup>b</sup> Ivan V. Kozhevnikov,<sup>c</sup> Elena F. Kozhevnikova<sup>c</sup>  
and Elena V. Gusevskaya\*<sup>a</sup>

<sup>a</sup> Departamento de Química, Universidade Federal de Minas Gerais 31270-901, Belo Horizonte, MG, Brazil. Fax: (+)55 31 34095700; Tel:

(+)55 31 34095741. E-mail: [elena@ufmg.br](mailto:elena@ufmg.br)

<sup>b</sup> Departamento de Química, Universidade Federal de Ouro Preto, 35400-000, Ouro Preto, MG, Brazil

<sup>c</sup> Department of Chemistry, University of Liverpool, Liverpool L69 7ZD, UK.

## Supplementary Information

Table of contents

Catalyst characterization data-----S2

Product characterization data -----S3-S7

## Catalyst characterization data

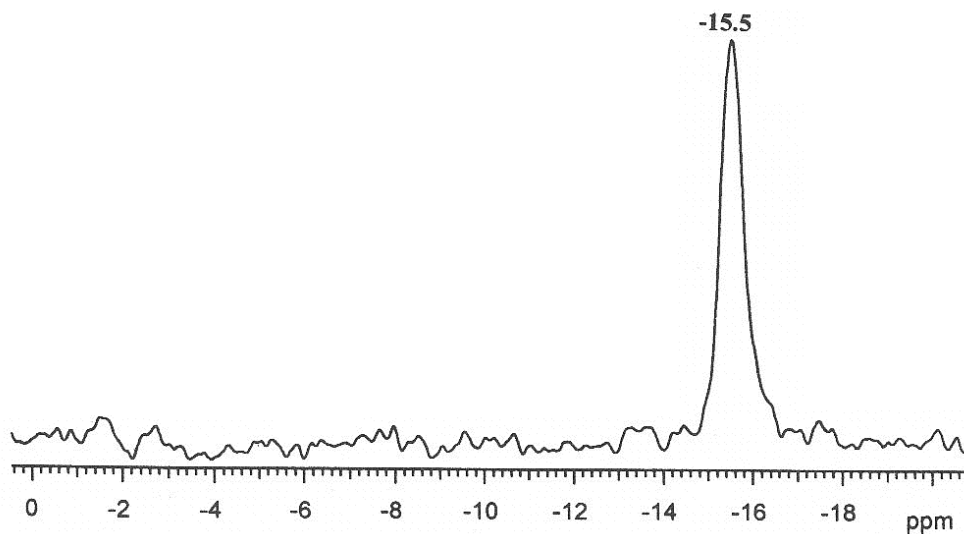

Fig. S1.  $^{31}\text{P}$  MAS NMR spectrum for 20% $\text{H}_3\text{PW}_{12}\text{O}_{40}/\text{SiO}_2$ .

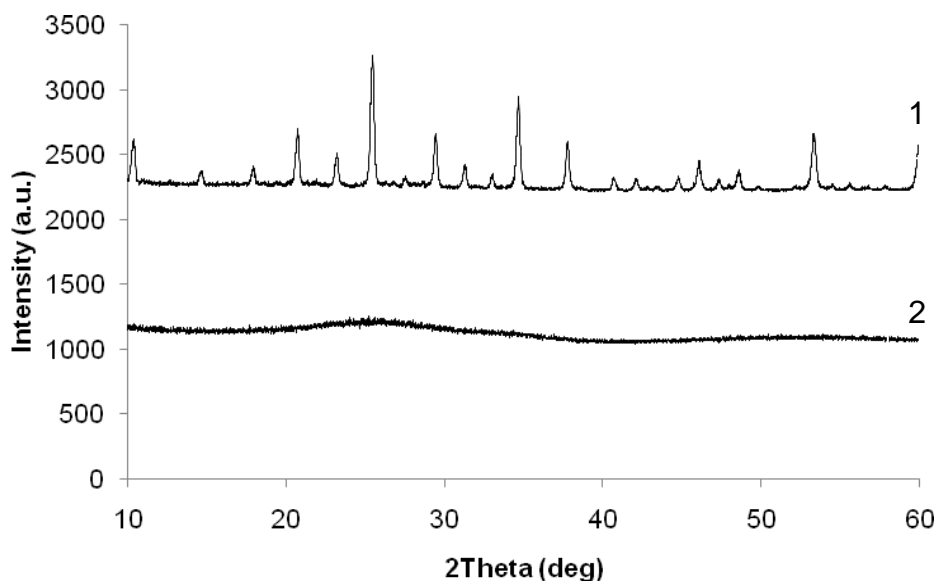

Fig. S2. XRD patterns for  $\text{H}_3\text{PW}_{12}\text{O}_{40}$  (1) and 20% $\text{H}_3\text{PW}_{12}\text{O}_{40}/\text{SiO}_2$  (2).

The acid properties of the catalysts under study ( $\text{H}_3\text{PW}_{12}\text{O}_{40}$ ,  $\text{H}_3\text{PW}_{12}\text{O}_{40}/\text{SiO}_2$  and  $\text{Cs}_{2.5}\text{H}_{0.5}\text{PW}_{12}\text{O}_{40}$ ) have been discussed in detail elsewhere,<sup>35,36</sup> including the number and the nature of acid sites and their strength.

## Product characterization data

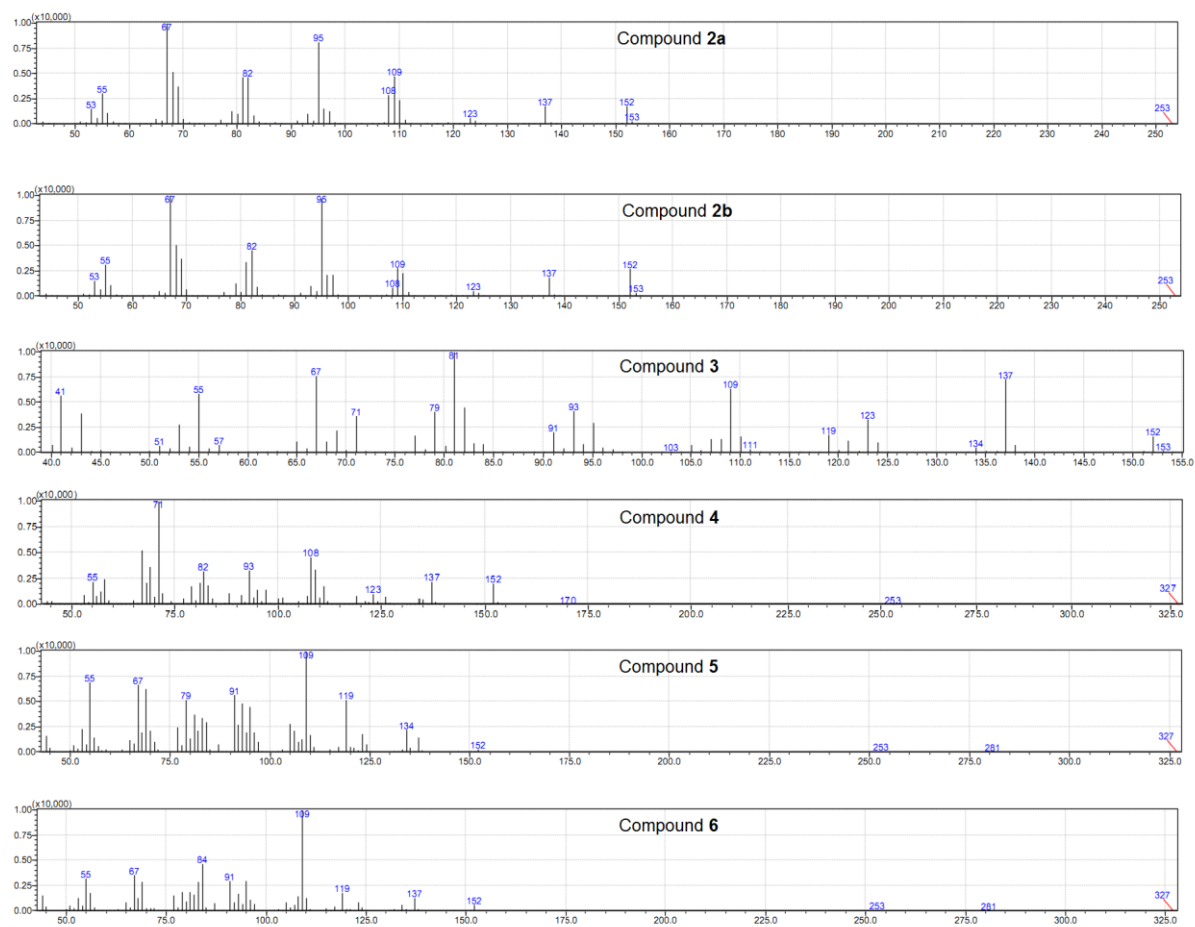

Fig. S3. Mass spectra of compounds **2a**, **2b**, **3**, **4**, **5** and **6** (the structures are shown on Scheme 1).

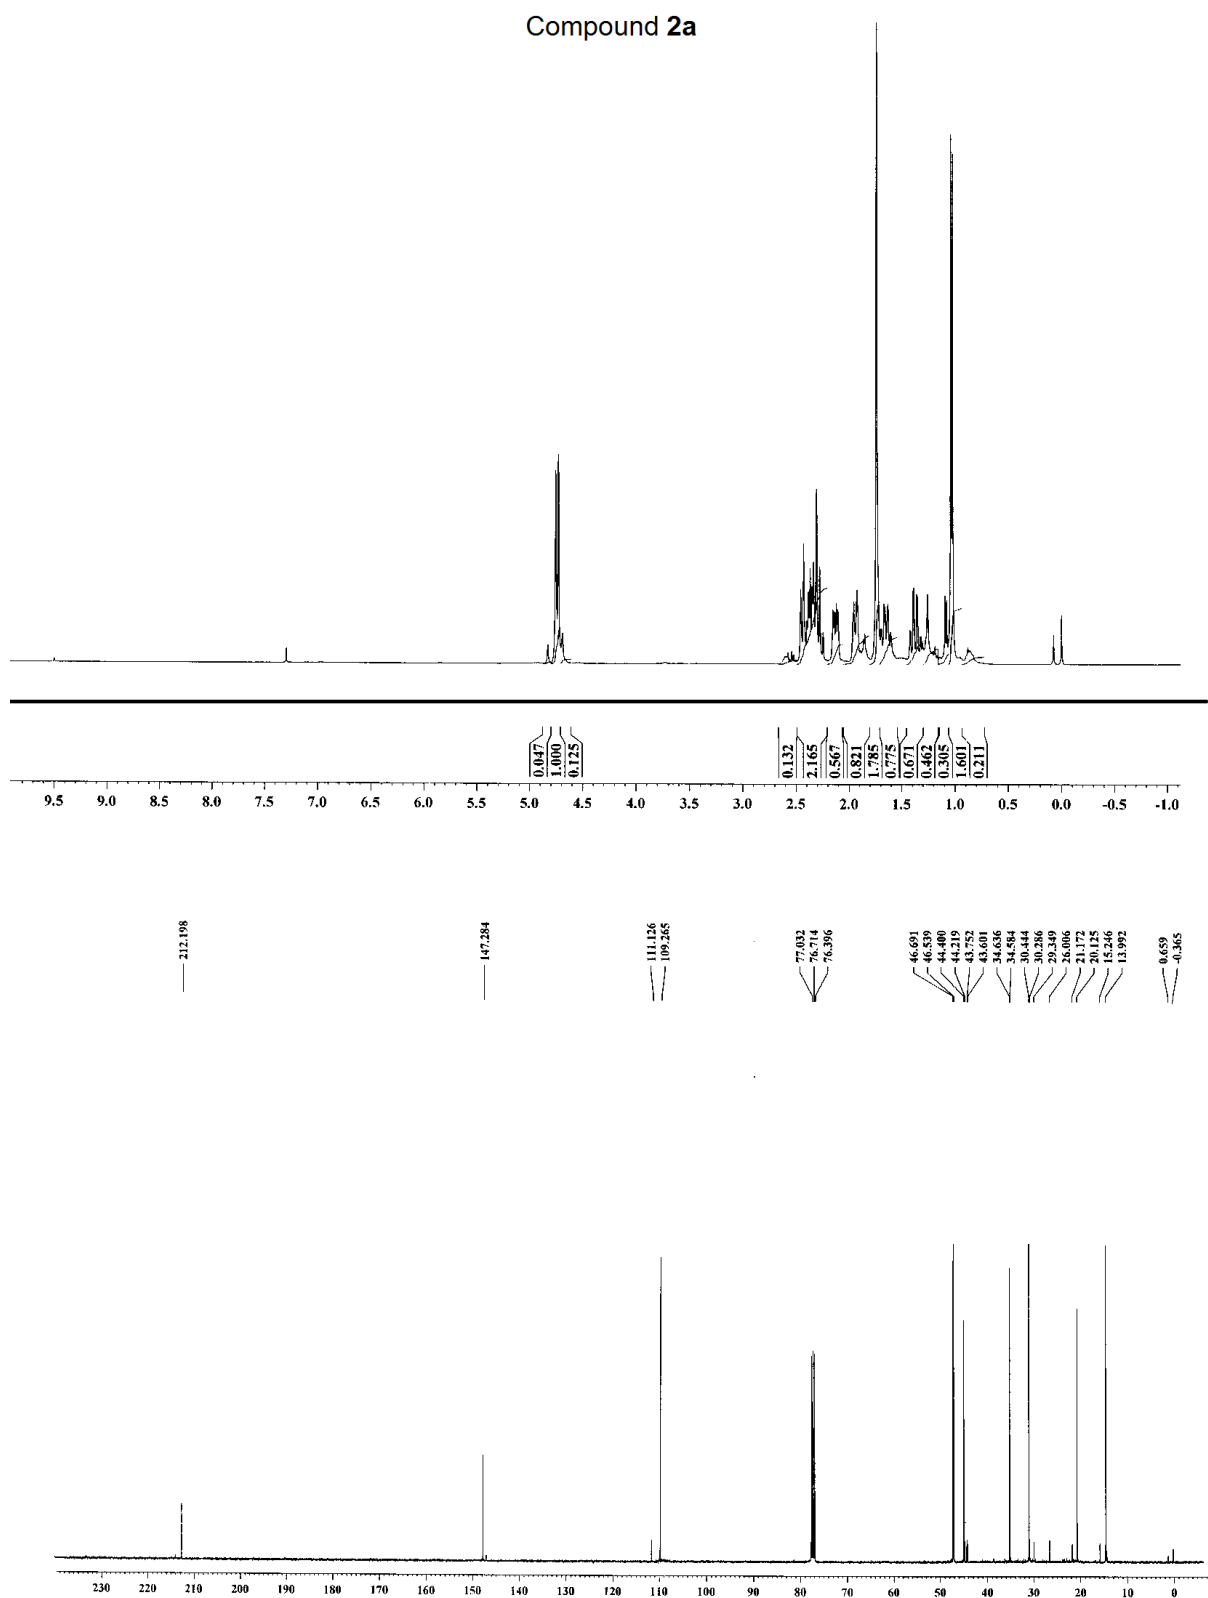

Fig. S4.  $^1\text{H}$  and  $^{13}\text{C}$  spectra of compound 2a.

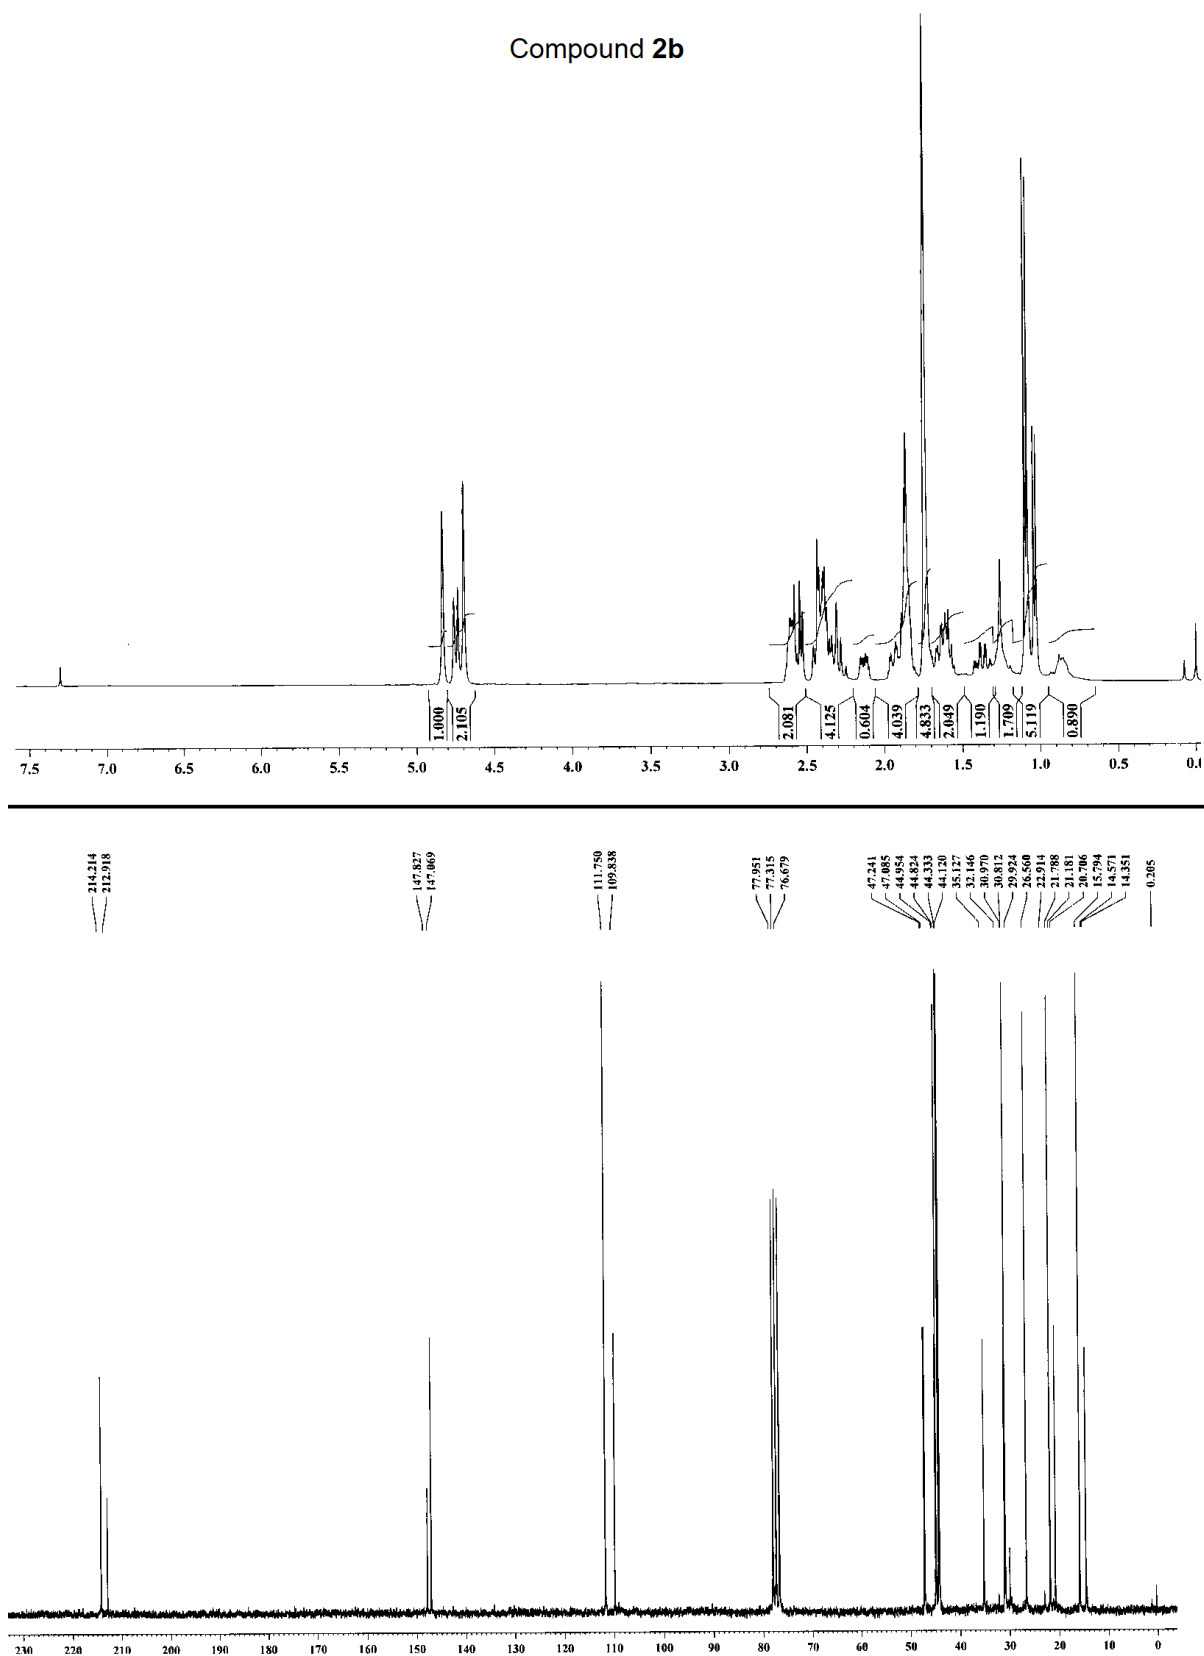

Fig. S5. <sup>1</sup>H and <sup>13</sup>C spectra of compound **2b** (the solution also contains **2a**: **2a/2b**  $\approx$  1/2).

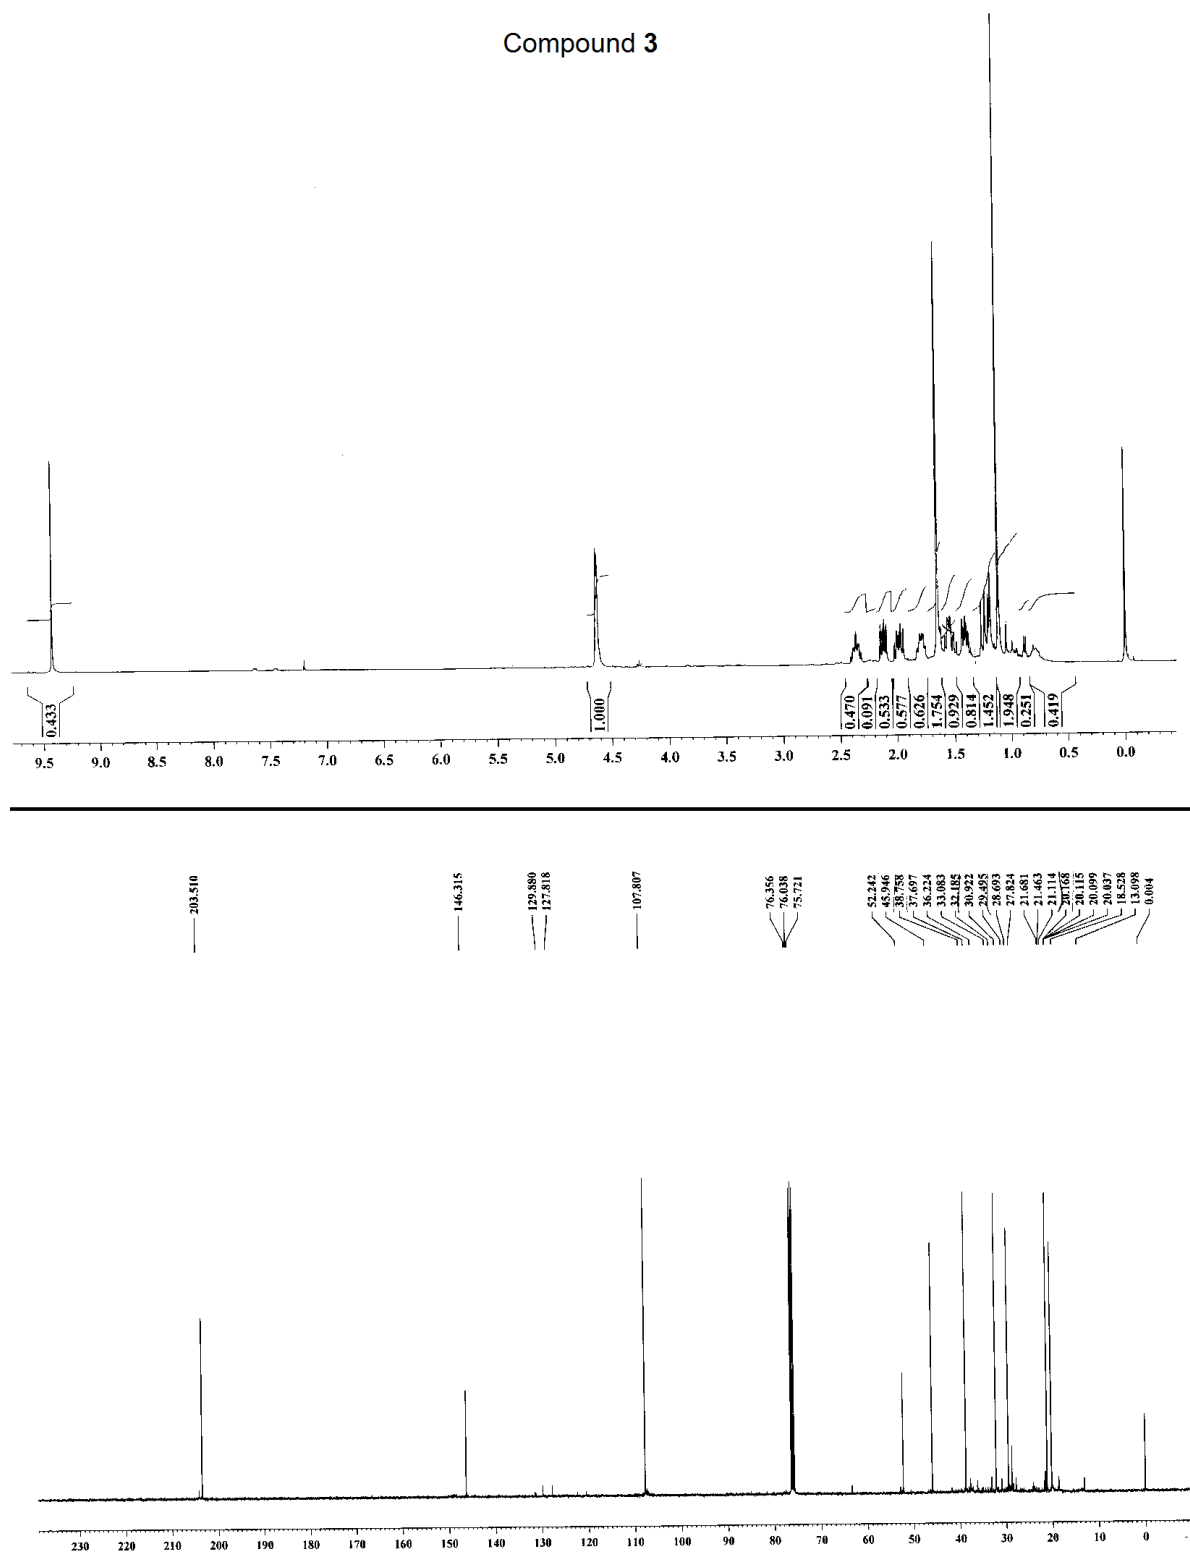

Fig. S6. <sup>1</sup>H and <sup>13</sup>C spectra of compound 3.

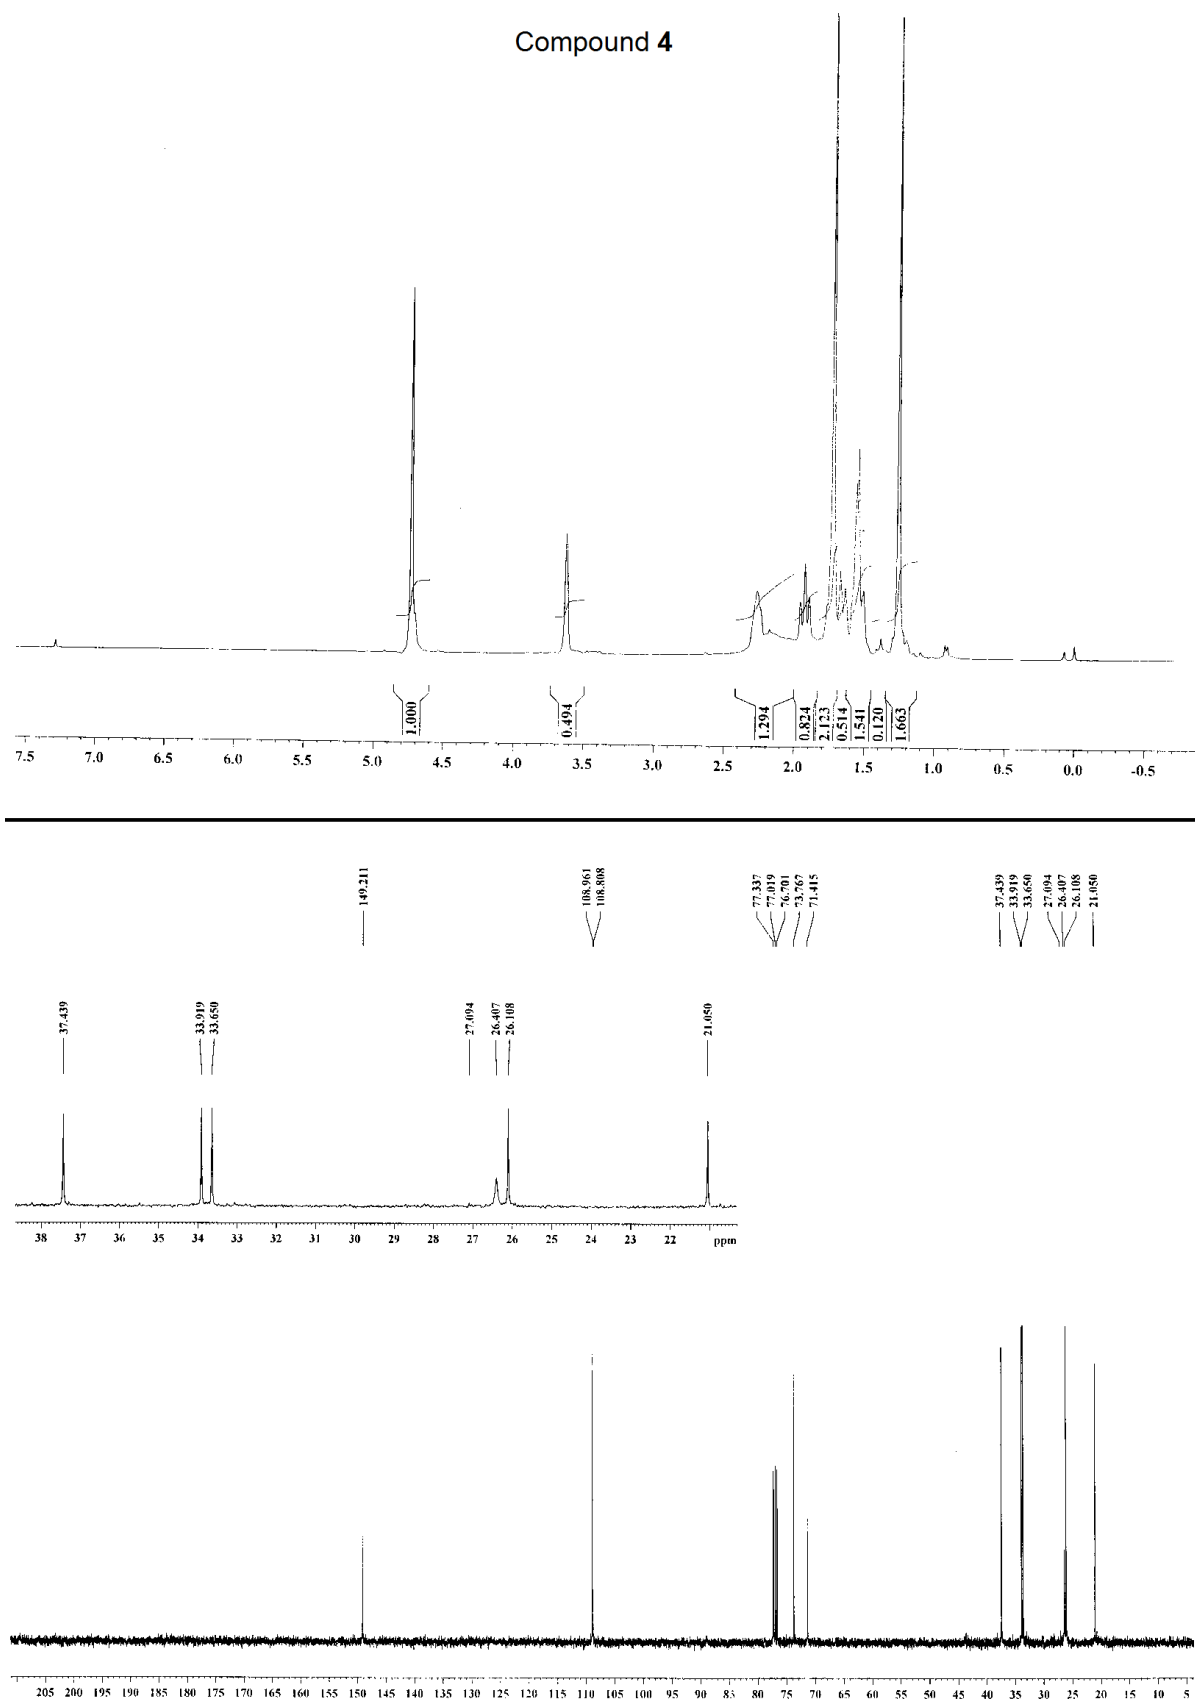

Fig. S7. <sup>1</sup>H and <sup>13</sup>C spectra of compound 4.
